# Supplementary material for: Weak Intermolecular Interactions in a Series of Bioactive Oxazoles
Source: MDPI journal article supplement (doi:10.3390/molecules26103024), 2021-05-19
Supplement: s1 [file s1]

**Weak intermolecular interactions in a series of bioactive oxazoles**

Anita M. Grześkiewicz, Tomasz Stefański and Maciej Kubicki\*

<sup>1</sup> Faculty of Chemistry, Adam Mickiewicz University, Uniwersytetu Poznańskiego 8, 61-614 Poznań, Poland

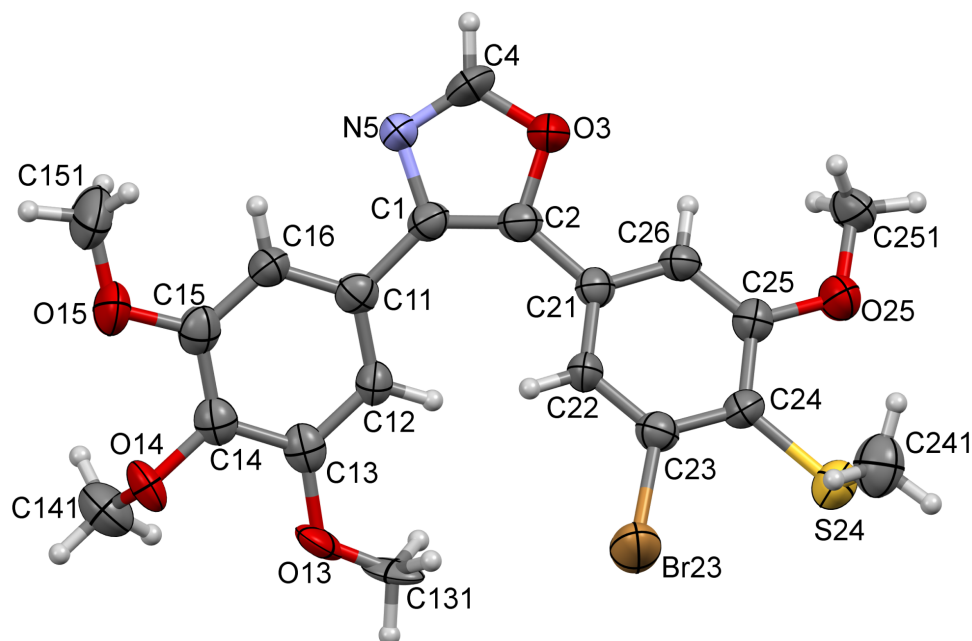

Figure 1. A perspective view of the molecule **2**; ellipsoids are drawn at the 50% probability level, hydrogen atoms are shown as spheres of arbitrary radii.

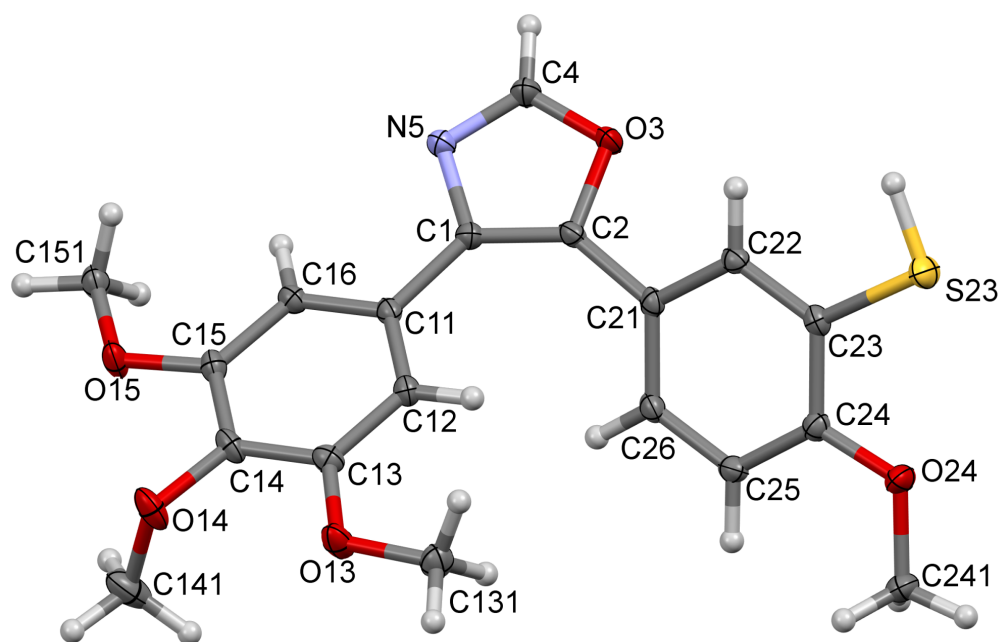

Figure 2. A perspective view of the molecule **3**; ellipsoids are drawn at the 50% probability level, hydrogen atoms are shown as spheres of arbitrary radii.

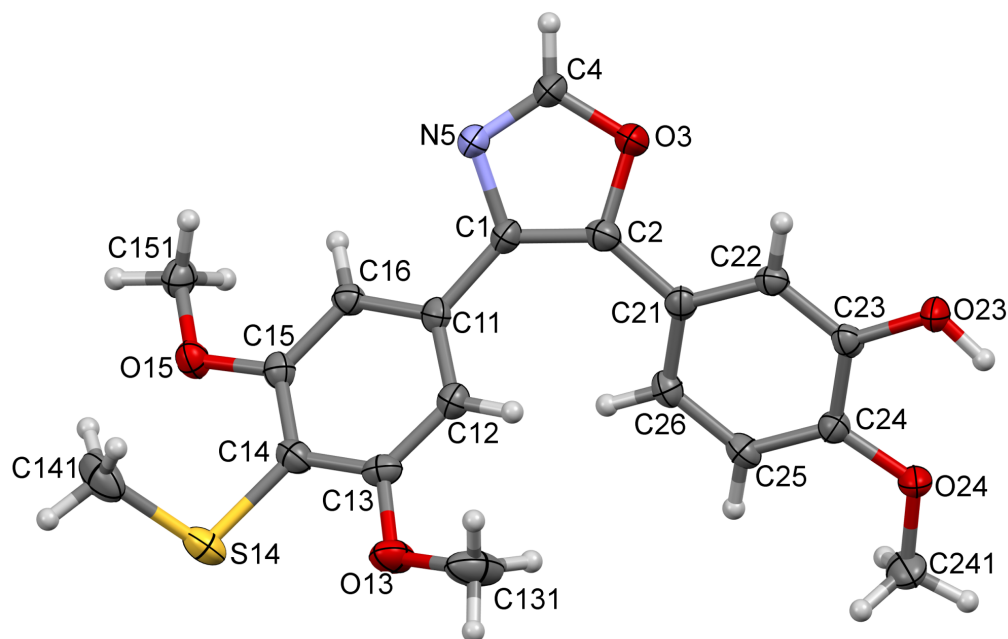

Figure 3. A perspective view of the molecule **4**; ellipsoids are drawn at the 50% probability level, hydrogen atoms are shown as spheres of arbitrary radii.

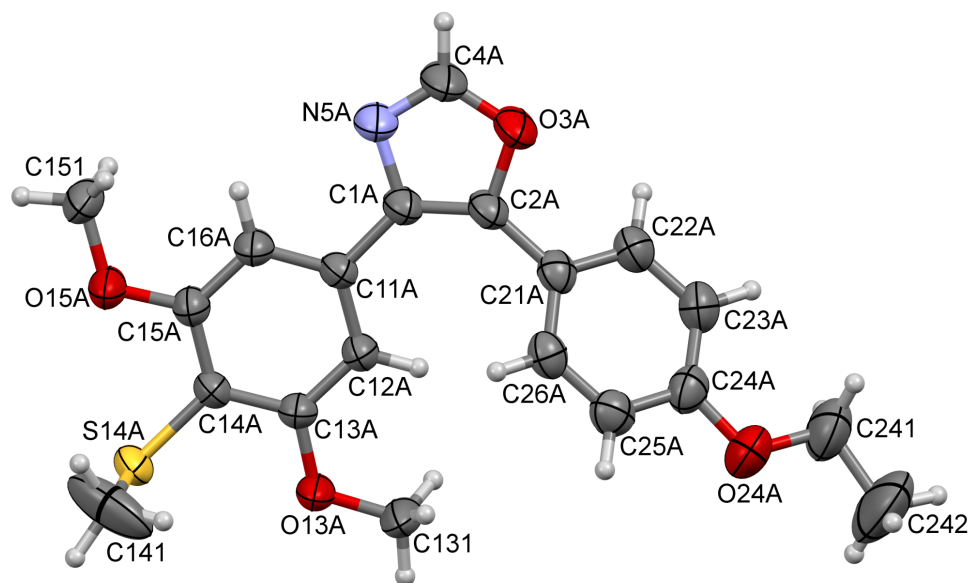

Figure 4. A perspective view of the molecule **6A**; ellipsoids are drawn at the 50% probability level, hydrogen atoms are shown as spheres of arbitrary radii.

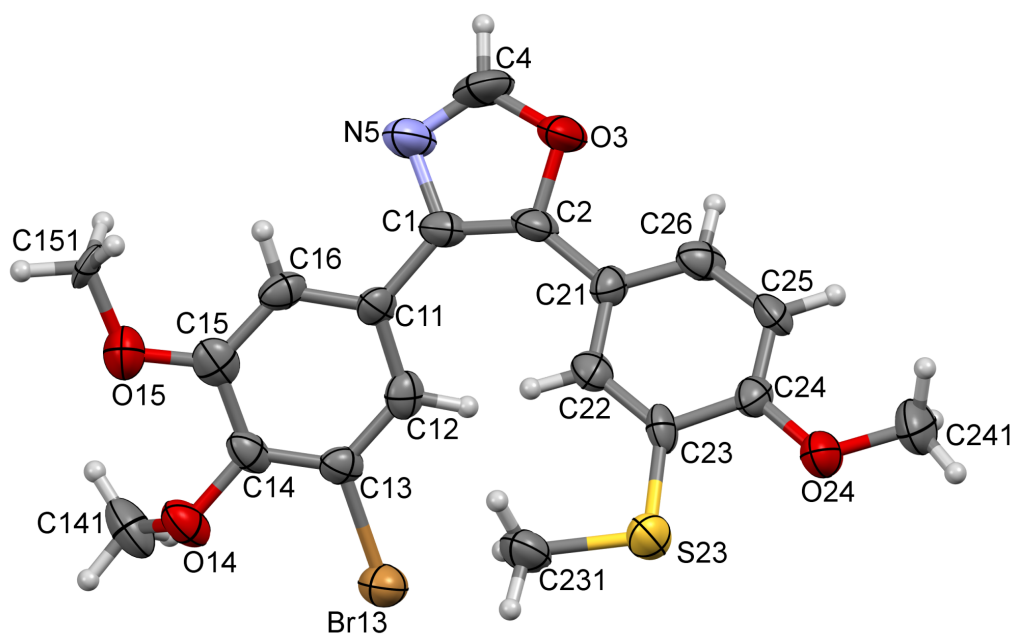

Figure 5. A perspective view of the molecule **7**; ellipsoids are drawn at the 50% probability level, hydrogen atoms are shown as spheres of arbitrary radii.

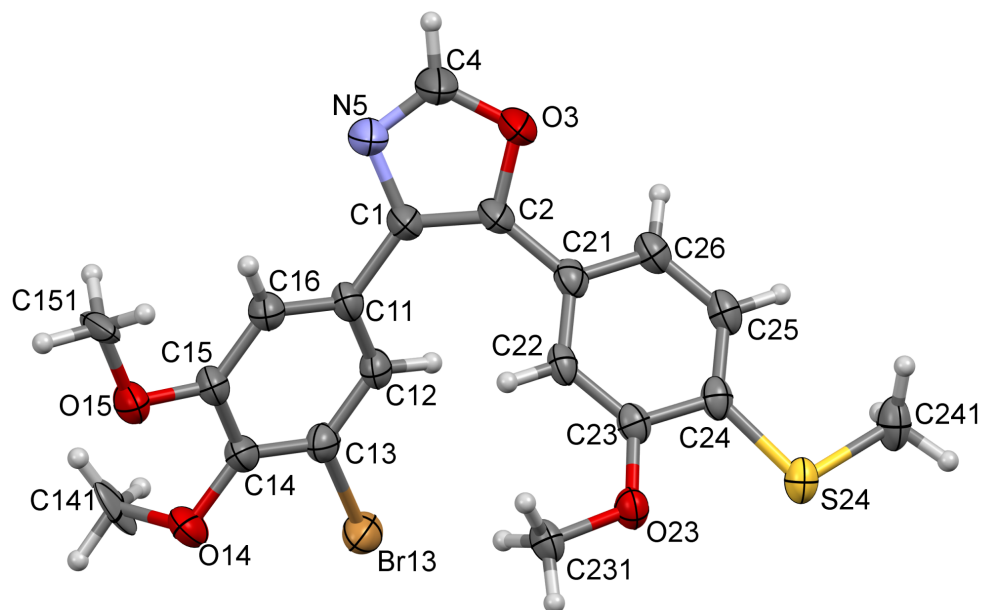

Figure 6. A perspective view of the molecule **9**; ellipsoids are drawn at the 50% probability level, hydrogen atoms are shown as spheres of arbitrary radii.

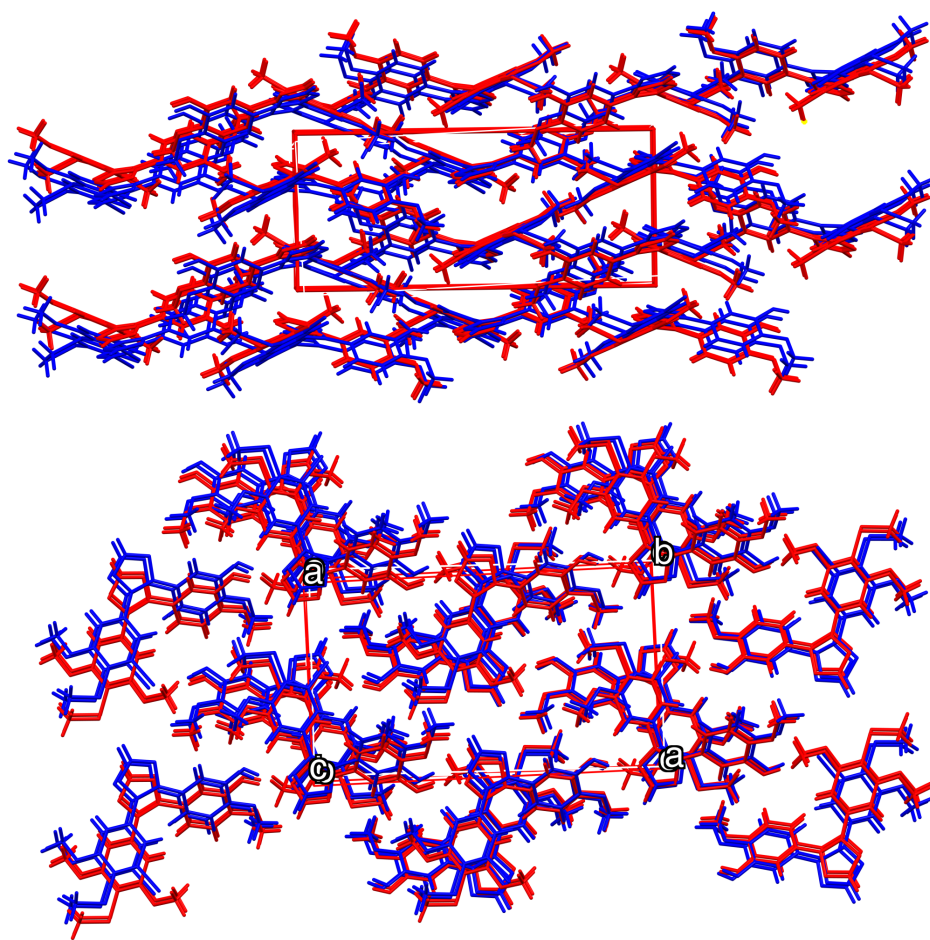

Fig. 7. Two comparisons of crystal packings of compounds **4** and **9**, showing high degree of their isostructurality

Tables 1 – 8. The details of the interactions for the pairs of molecules for which critical points were found.  $G_{cp}$ : kinetic energy density (kJ/mol/Bohr<sup>3</sup>);  $V_{cp}$ : potential energy density (kJ/mol/Bohr<sup>3</sup>); DEN: electron density at the BCP (e·Å<sup>-3</sup>), LAP: laplacian at the BCP (e·Å<sup>-5</sup>); distances in Å, angles in °, energies in kJ/mol.

**Table 1: 1**

| Atom1 | Atom2 | sym2  | Gcp   | Vcp    | DEN     | LAP   | X...Y | H...Y | D-H...Y | Pix   | HF    |
|-------|-------|-------|-------|--------|---------|-------|-------|-------|---------|-------|-------|
| C16   | C12   | 45501 | 4,35  | -2,77  | 0,01834 | 0,218 | 3,742 |       |         | -78.9 | -69.1 |
| C14   | H13C  | 45501 | 8,55  | -6,18  | 0,03675 | 0,401 | 3.717 | 2.90  | 131     |       |       |
| O15   | H14B  | 45501 | 10,27 | -6,41  | 0,02888 | 0,519 | 3.447 | 2.78  | 119     |       |       |
| O14   | H14B  | 45501 | 3,86  | -2,43  | 0,01651 | 0,194 | 4.173 | 3.14  | 158     |       |       |
| H15C  | C11   | 45501 | 8,86  | -7,02  | 0,0442  | 0,393 | 3.980 | 2.90  | 170     |       |       |
| H22   | H12   | 45501 | 0,98  | -0,58  | 0,00581 | 0,051 | 3.39  |       |         |       |       |
| O23   | H24A  | 45501 | 14,83 | -10,65 | 0,05047 | 0,698 | 3.452 | 2.53  | 142     |       |       |
| H23C  | C24   | 45501 | 12,94 | -10,26 | 0,05547 | 0,574 | 3.550 | 2.69  | 136     |       |       |
| S24   | H24A  | 45501 | 9,07  | -6,53  | 0,03773 | 0,427 | 3.894 | 2.96  | 144     |       |       |
| H16   | H24B  | 46501 | 3,11  | -1,98  | 0,01485 | 0,156 | 2,70  |       |         | -8.8  | -10.0 |
| C151  | S24   | 46501 | 6,26  | -3,9   | 0,02138 | 0,316 | 3.707 |       |         |       |       |
| O23   | H15B  | 54501 | 11,62 | -7,96  | 0,03949 | 0,561 | 3.504 | 2.65  | 135     | -21.9 | -18.0 |
| H23A  | H15A  | 54501 | 5,94  | -3,82  | 0,02275 | 0,295 | 2.50  |       |         |       |       |
| S24   | H15B  | 54501 | 8,29  | -6,68  | 0,04365 | 0,363 | 4.022 | 2.97  | 164     |       |       |
| S24   | C16   | 54501 | 6,38  | -4,33  | 0,02705 | 0,309 | 3.736 |       |         |       |       |
| H24B  | N5    | 54501 | 12,44 | -8,19  | 0,03749 | 0,613 | 3.406 | 2.73  | 120     |       |       |
| H23A  | O14   | 56602 | 22,51 | -17,79 | 0,077   | 0,999 | 3.308 | 2.34  | 147     | -11.2 | -30.6 |
| H14B  | O14   | 56602 | 3,86  | -2,43  | 0,01651 | 0,194 |       |       |         |       |       |
| H15A  | C141  | 57602 | 8,09  | -5,61  | 0,03267 | 0,388 | 3.916 | 2.87  | 160     | -10.0 | -14.5 |
| H13A  | O13   | 66602 | 12,71 | -8,13  | 0,03529 | 0,634 | 3.259 | 2.74  | 109     | -40.9 | -53.7 |
| O13   | H23B  | 66602 | 2,3   | -1,28  | 0,00743 | 0,122 | 4.084 | 3.37  | 124     |       |       |
| H13A  | O14   | 66602 | 7,86  | -4,98  | 0,02567 | 0,394 | 3.613 | 2.84  | 128     |       |       |
| H14A  | O23   | 66602 | 12,93 | -8,69  | 0,04038 | 0,63  | 3.429 | 2.63  | 130     |       |       |
| H14A  | S24   | 66602 | 6,97  | -5,34  | 0,03615 | 0,316 | 4.137 | 3.07  | 167     |       |       |
| O3    | C24   | 66702 | 5,62  | -3,55  | 0,02087 | 0,282 | 3.590 |       |         | -35.3 | -25.1 |
| H4    | S24   | 66702 | 9     | -6,27  | 0,03517 | 0,43  | 3.790 | 3.13  | 120     |       |       |
| C26   | C26   | 66702 | 1,39  | -0,81  | 0,00665 | 0,073 | 4.440 |       |         |       |       |
| H24C  | C4    | 66702 | 11,76 | -8,07  | 0,03994 | 0,567 | 3.602 | 2.79  | 131     |       |       |
| H14C  | O15   | 67602 | 12,69 | -8,23  | 0,03649 | 0,629 | 3.376 | 2.67  | 122     | -12.7 | -15.4 |

|      |      |       |       |        |         |       |       |       |     |       |       |
|------|------|-------|-------|--------|---------|-------|-------|-------|-----|-------|-------|
| H14C | H14C | 67602 | 12,35 | -10,16 | 0,05718 | 0,534 | 2.09  |       |     |       |       |
| H4   | N5   | 67702 | 19,54 | -13,48 | 0,05478 | 0,94  | 2.48  | 3.413 | 143 | -5.9  | -27.1 |
| H13A | H13A | 76602 | 13,55 | -9,05  | 0,04088 | 0,663 | 2.21  |       |     | -4.3  | -6.1  |
| O3   | H24C | 76702 | 9,12  | -5,71  | 0,02712 | 0,46  | 3.423 | 2.88  | 111 | -15.4 | -19.7 |
| O3   | H25  | 76702 | 3,98  | -2,5   | 0,01664 | 0,201 | 4.166 | 3.08  | 173 |       |       |
| H26  | H25  | 76702 | 15,29 | -10,96 | 0,05126 | 0,72  | 2.11  |       |     |       |       |

**Table 2: 2**

| Atom1 | Atom2 | sym2  | Gcp   | Vcp    | DEN     | LAP   | X...Y | H...Y | D-H...Y | Pix    | HF    |
|-------|-------|-------|-------|--------|---------|-------|-------|-------|---------|--------|-------|
| H15A  | O25   | 45404 | 10,74 | -7,88  | 0,04334 | 0,499 | 3.689 | 2.64  | 162     | -13.3  | -17.6 |
| H4    | Br23  | 55404 | 19,63 | -15,18 | 0,0684  | 0,884 | 3.466 | 2.77  | 121     | -10.2  | -17.3 |
| H4    | S24   | 55404 | 15,23 | -10,21 | 0,04421 | 0,743 | 3.844 | 2.78  | 166     |        |       |
| H13A  | O14   | 64502 | 15,02 | -9,85  | 0,04152 | 0,742 | 3.183 | 2.68  | 108     | -25.1  | -20.4 |
| N5    | H24C  | 74502 | 10,54 | -7,02  | 0,0349  | 0,516 | 3.578 | 2.74  | 133     | -108.9 | -86.9 |
| O13   | H25C  | 74502 | 8,81  | -6,64  | 0,04043 | 0,403 | 3.897 | 2.81  | 173     |        |       |
| H13B  | O3    | 74502 | 12,71 | -9,11  | 0,04581 | 0,599 | 3,541 | 2.58  | 147     |        |       |
| C16   | H24B  | 74502 | 7,65  | -5,17  | 0,02985 | 0,372 | 3.732 | 2.87  | 136     |        |       |

**Table 3: 3**

| Atom1 | Atom2 | sym2  | Gcp   | Vcp    | DEN     | LAP   | X...Y | H...Y | D-H...Y | Pix   | HF    |
|-------|-------|-------|-------|--------|---------|-------|-------|-------|---------|-------|-------|
| H23   | H15A  | 44401 | 8,05  | -5,33  | 0,0293  | 0,395 | 2.51  |       |         | -8.8  | -4.8  |
| S23   | H14B  | 44401 | 7,75  | -6     | 0,03922 | 0,349 | 4.067 | 3.01  | 164     |       |       |
| H24C  | H14A  | 54401 | 5,56  | -3,62  | 0,02241 | 0,275 | 2.59  |       |         | -10.3 | 5.0   |
| O3    | H13A  | 54501 | 6,79  | -4,25  | 0,02264 | 0,343 | 3.703 | 2.89  | 132     | -10.0 | -24.0 |
| H4    | H14C  | 54501 | 13,28 | -8,66  | 0,038   | 0,658 | 2.24  |       |         |       |       |
| H4    | O13   | 54501 | 23,78 | -16,67 | 0,0638  | 1,134 | 3.297 | 2.35  | 144     |       |       |
| H24B  | H15B  | 55401 | 14,22 | -11,26 | 0,05858 | 0,631 | 2.20  |       |         |       |       |
| H24A  | H16   | 55401 | 8,27  | -4,98  | 0,02258 | 0,424 | 2.56  |       |         | -6.8  | -13.1 |
| H24A  | N5    | 55401 | 13,25 | -9,8   | 0,04993 | 0,613 | 3.560 | 2.63  | 143     |       |       |
| H22   | S23   | 55502 | 6,42  | -4,12  | 0,0235  | 0,321 | 3.788 | 3.28  | 110     |       |       |
| S23   | S23   | 55502 | 6,96  | -4,72  | 0,02843 | 0,338 | 3.859 |       |         | -18.4 | -17.5 |
| C131  | S23   | 56502 | 8,68  | -5,7   | 0,03004 | 0,428 | 3.654 |       |         |       |       |
| H13C  | H24A  | 56502 | 12,39 | -8,91  | 0,04547 | 0,583 | 2.18  |       |         |       |       |
| C23   | H24B  | 56502 | 15,1  | -12,57 | 0,06568 | 0,647 | 3.619 | 2.63  | 151     |       |       |
| C1    | C12   | 56602 | 5,61  | -3,74  | 0,02398 | 0,274 | 3.641 |       |         | -85.6 | -87.4 |
| N5    | H13C  | 56602 | 12,8  | -9,47  | 0,04889 | 0,592 | 3.691 | 2.71  | 150     |       |       |

|      |      |       |       |        |         |       |       |      |     |       |       |
|------|------|-------|-------|--------|---------|-------|-------|------|-----|-------|-------|
| C15  | H22  | 56602 | 9,11  | -6,17  | 0,03331 | 0,442 | 3.599 | 2.88 | 123 |       |       |
| O15  | H23  | 56602 | 7,92  | -5,28  | 0,02946 | 0,388 | 3.728 | 2.85 | 129 |       |       |
| C151 | S23  | 56602 | 6,77  | -4,32  | 0,02392 | 0,339 | 3.714 |      |     |       |       |
| O13  | O13  | 57602 | 9,53  | -6     | 0,02832 | 0,48  | 3.209 |      |     | -18.5 | -32.1 |
| H13A | O14  | 57602 | 12,37 | -8,14  | 0,03734 | 0,609 | 3.430 | 2.65 | 128 |       |       |
| H24C | C25  | 66502 | 6,68  | -4,87  | 0,03224 | 0,312 | 4.037 | 2.97 | 167 | -11.3 | -12.1 |
| C1   | C1   | 66602 | 5,69  | -3,81  | 0,02433 | 0,278 | 3.616 |      |     | -74.4 | -66.8 |
| C2   | C16  | 66602 | 7,49  | -5,1   | 0,02998 | 0,363 | 3.494 |      |     |       |       |
| N5   | H26  | 66602 | 8,53  | -5,72  | 0,03132 | 0,416 | 3.708 | 2.80 | 141 |       |       |
| H16  | C26  | 66602 | 7,67  | -5,32  | 0,03159 | 0,368 | 3.815 | 2.99 | 146 |       |       |
| H15C | C21  | 66602 | 14,53 | -12,81 | 0,06975 | 0,596 | 3.483 | 2.52 | 147 |       |       |
| H13B | C141 | 67602 | 9,35  | -6,38  | 0,03435 | 0,452 | 3.843 | 2.88 | 148 | -21.1 | -20.7 |
| H25  | H14A | 67602 | 7,25  | -4,44  | 0,02209 | 0,369 | 2.44  |      |     |       |       |
| H26  | H14A | 67602 | 5,7   | -3,28  | 0,01504 | 0,298 | 2.63  |      |     |       |       |
| H15A | O15  | 67702 | 19,69 | -15,4  | 0,06987 | 0,88  | 3.388 | 2.40 | 151 | -9.7  | -26.2 |

**Table 4: 4**

| Atom1 | Atom2 | sym2  | Gcp   | Vcp    | DEN     | LAP   | X...Y | H...Y | D-H...Y | Pix   | HF    |
|-------|-------|-------|-------|--------|---------|-------|-------|-------|---------|-------|-------|
| C2    | C15   | 46703 | 4,51  | -2,93  | 0,01966 | 0,224 | 4.382 |       |         | -89.8 | -66.4 |
| C11   | H26   | 46703 | 9,44  | -6,67  | 0,03728 | 0,448 | 3.733 | 2.85  | 139     |       |       |
| O3    | S14   | 46703 | 7,59  | -5     | 0,02788 | 0,374 | 3.538 |       |         |       |       |
| H12   | C16   | 46703 | 6,21  | -3,89  | 0,02169 | 0,313 | 3.766 | 3.05  | 124     |       |       |
| H12   | H15C  | 46703 | 2,9   | -1,98  | 0,01708 | 0,14  | 2.73  |       |         |       |       |
| H13C  | H16   | 46703 | 11,03 | -7,61  | 0,03883 | 0,531 | 2.28  |       |         |       |       |
| H13C  | N5    | 46703 | 12,59 | -10,2  | 0,05647 | 0,55  | 3.651 | 2.66  | 151     |       |       |
| H14B  | C23   | 46703 | 7,24  | -5,36  | 0,03481 | 0,335 | 3.953 | 2.98  | 150     |       |       |
| H15B  | H24C  | 46703 | 7,2   | -4,85  | 0,02851 | 0,351 | 2.46  |       |         |       |       |
| C22   | O15   | 46703 | 14,28 | -10,14 | 0,04821 | 0,677 | 3.096 |       |         |       |       |
| H22   | S14   | 46703 | 6,18  | -4,27  | 0,02755 | 0,297 | 4.095 | 3.17  | 143     |       |       |
| H4    | S14   | 54501 | 7,33  | -4,8   | 0,027   | 0,362 | 3.949 | 3.14  | 132     | -8.3  | -12.8 |
| H23   | N5    | 66402 | 56,52 | -82,77 | 0,27482 | 1,112 | 2.763 | 1.83  | 156     | -39.6 | -60.0 |
| O23   | H15B  | 66402 | 12,04 | -8,8   | 0,0461  | 0,561 | 3.620 | 2.60  | 155     |       |       |
| O23   | H16   | 66402 | 21,77 | -15,63 | 0,06353 | 1,025 | 3.216 | 2.38  | 132     |       |       |
| O24   | H4    | 66402 | 15,58 | -10,72 | 0,04758 | 0,75  | 3.211 | 2.63  | 113     |       |       |
| H13B  | H14C  | 67402 | 2,5   | -1,41  | 0,0081  | 0,132 | 2.89  |       |         | -10.6 | -12.2 |

|      |      |       |       |        |         |       |       |      |     |       |       |
|------|------|-------|-------|--------|---------|-------|-------|------|-----|-------|-------|
| H13A | H15A | 67402 | 4,66  | -2,88  | 0,01743 | 0,236 | 2.60  |      |     |       |       |
| C24  | H14A | 67402 | 10,8  | -7,83  | 0,04251 | 0,505 | 3.631 | 2.72 | 141 |       |       |
| H24B | H14B | 67402 | 17,2  | -13,15 | 0,06198 | 0,78  | 2.04  |      |     |       |       |
| O3   | H24A | 74604 | 7,96  | -4,78  | 0,02182 | 0,409 | 3.500 | 2.89 | 116 | -20.6 | -34.2 |
| C22  | H24B | 74604 | 13,47 | -9,77  | 0,04857 | 0,63  | 3.422 | 2.66 | 127 |       |       |
| O23  | H25  | 74604 | 12,77 | -9,4   | 0,04835 | 0,593 | 3.590 | 2.55 | 160 |       |       |
| H24C | H13A | 74604 | 16,42 | -10,95 | 0,04572 | 0,804 | 2.23  |      |     |       |       |
| H24A | O13  | 74604 | 11,5  | -7,38  | 0,0335  | 0,573 | 3.467 | 2.71 | 126 |       |       |
| C151 | H14A | 74704 | 16,71 | -11,64 | 0,05089 | 0,8   | 3.421 | 2.66 | 127 | -2.9  | -7.4  |

**Table 5: 5**

| Atom1 | Atom2 | sym2  | Gcp   | Vcp    | DEN     | LAP   | X...Y | H...Y | D-H...Y | Pix   | HF    |
|-------|-------|-------|-------|--------|---------|-------|-------|-------|---------|-------|-------|
| F23   | H15B  | 46401 | 18,96 | -13,03 | 0,05336 | 0,914 | 3.203 | 2.38  | 131     | -2.7  | -2.5  |
| H13B  | O3    | 54501 | 5,68  | -3,58  | 0,02079 | 0,286 | 3.801 | 2.92  | 138     | -9.8  | -28.2 |
| O13   | H4    | 54501 | 18,27 | -12,32 | 0,05001 | 0,889 | 3.398 | 2.48  | 142     |       |       |
| S14   | H4    | 54501 | 19,03 | -13,93 | 0,06082 | 0,886 | 3.637 | 2.70  | 144     |       |       |
| H14B  | O24   | 54601 | 21    | -16,63 | 0,07406 | 0,932 | 3.377 | 2.38  | 152     | -8.1  | -8.9  |
| H24B  | H16   | 55401 | 7,96  | -4,83  | 0,02262 | 0,407 | 2.50  |       |         | -7.4  | -10.9 |
| H24B  | N5    | 55401 | 10,61 | -7,54  | 0,04046 | 0,502 | 3.657 | 2.73  | 143     |       |       |
| H24C  | H15C  | 55401 | 11,67 | -8,78  | 0,04767 | 0,535 | 2.26  |       |         |       |       |
| H13B  | H14C  | 56602 | 8,12  | -5,38  | 0,02948 | 0,399 | 2.34  |       |         | -13.9 | -9.9  |
| H13B  | F23   | 57502 | 2,42  | -1,31  | 0,00626 | 0,13  | 3.837 | 3.32  | 110     | -31.2 | -45.9 |
| H13A  | H24B  | 57502 | 5,88  | -3,72  | 0,02159 | 0,295 | 2.57  |       |         |       |       |
| H13A  | O24   | 57502 | 7,34  | -4,4   | 0,02066 | 0,378 | 3.504 | 2.93  | 113     |       |       |
| C23   | H24C  | 57502 | 15,65 | -11,32 | 0,05288 | 0,734 | 3.371 | 2.63  | 124     |       |       |
| H14C  | O3    | 57602 | 2,97  | -1,78  | 0,01199 | 0,153 | 4.188 | 3.22  | 148     | -76.0 | -72.9 |
| C15   | H22   | 57602 | 6,48  | -4,37  | 0,02686 | 0,315 | 3.803 | 2.99  | 131     |       |       |
| N5    | C12   | 57602 | 6,97  | -4,66  | 0,02749 | 0,341 | 3.568 |       |         |       |       |
| H14C  | H22   | 57602 | 10,3  | -7,12  | 0,03753 | 0,495 | 2.25  |       |         |       |       |
| C4    | H13A  | 57602 | 13,33 | -9,18  | 0,04339 | 0,642 | 3.467 | 2.76  | 122     |       |       |
| C13   | S14   | 66602 | 4,69  | -3,13  | 0,02168 | 0,229 | 3.886 |       |         | -54.5 | -54.0 |
| H13C  | S14   | 66602 | 11,01 | -8,54  | 0,04862 | 0,495 | 3.886 | 2.89  | 142     |       |       |
| H26   | S14   | 66602 | 11,53 | -8,35  | 0,04412 | 0,54  | 3.693 | 2.86  | 133     |       |       |
| H15B  | H15B  | 66702 | 5,99  | -3,46  | 0,0157  | 0,313 | 2.78  |       |         | -6.9  | -11.0 |
| H15B  | H14A  | 66702 | 8,86  | -6,2   | 0,03512 | 0,423 | 2.27  |       |         |       |       |



|      |      |       |       |       |         |       |       |      |     |       |       |
|------|------|-------|-------|-------|---------|-------|-------|------|-----|-------|-------|
| H24A | C25  | 67502 | 8,86  | -7,05 | 0,04446 | 0,392 | 3.895 | 2.81 | 175 | -13.8 | -14.0 |
| N5   | H26  | 67602 | 4,69  | -2,89 | 0,01739 | 0,238 | 3.920 | 3.07 | 135 | -64.6 | -55.3 |
| C1   | N5   | 67602 | 5,45  | -3,56 | 0,02242 | 0,269 | 3.648 |      |     |       |       |
| H15A | C21  | 67602 | 8,34  | -6,18 | 0,03798 | 0,385 | 3.846 | 2.90 | 145 |       |       |
| O3   | C16  | 67602 | 8,97  | -6,05 | 0,03267 | 0,436 | 3.345 |      |     |       |       |
| O3   | H15A | 67602 | 10,96 | -8,04 | 0,04391 | 0,509 | 3.655 | 2.64 | 155 |       |       |

**Table 6: 6**

| Atom1 | Atom2 | sym2  | Gcp       | Vcp    | DEN     | LAP   | X...Y | H...Y | D-H...Y | Pix   | HF    |
|-------|-------|-------|-----------|--------|---------|-------|-------|-------|---------|-------|-------|
| H13C  | C4A   | 45501 | 4,2       | -2,67  | 0,01778 | 0,21  | 3.988 | 3.22  | 128     | -13.9 | -5.8  |
| H25A  | O3A   | 45501 | 0,45      | -0,24  | 0,00208 | 0,024 | 5.164 | 4.19  | 155     |       |       |
| H14A  | N5A   | 45501 | 1,26      | -0,71  | 0,00562 | 0,066 | 4.637 | 3.66  | 150     |       |       |
| H14B  | H15C  | 45501 | 5,12      | -3,3   | 0,02086 | 0,255 | 2.50  |       |         |       |       |
| H14D  | N5B   | 45501 | 1,26      | -0,72  | 0,0059  | 0,066 | 4.732 | 3.69  | 160     | -14.4 | -9.1  |
| H14D  | H16B  | 45501 | 1,85      | -1,07  | 0,00786 | 0,097 | 3.00  |       |         |       |       |
| H14E  | H15F  | 45501 | 9,55      | -6,02  | 0,02851 | 0,48  | 2.34  |       |         |       |       |
| H13F  | C4B   | 45501 | 9,74      | -6,67  | 0,03549 | 0,47  | 3.490 | 2.86  | 117     |       |       |
| H13E  | O3A   | 45501 | 5,78      | -3,59  | 0,02015 | 0,292 | 3.780 | 2.94  | 134     | -12.2 | -27.7 |
| S14B  | H4A   | 45501 | 14,9<br>3 | -10,65 | 0,05001 | 0,705 | 3.753 | 2.80  | 146     |       |       |
| O13B  | H4A   | 45501 | 22,2<br>7 | -15,52 | 0,06057 | 1,066 | 3.328 | 2.40  | 143     |       |       |
| H24I  | H24E  | 54501 | 2,77      | -1,64  | 0,01094 | 0,143 | 2.82  |       |         |       |       |
| H24G  | H24B  | 54501 | 3,31      | -1,92  | 0,01126 | 0,173 | 2.92  |       |         | -93.6 | -73.2 |
| H24F  | O24A  | 54501 | 4,44      | -2,83  | 0,01849 | 0,222 | 3.964 | 3.11  | 135     |       |       |
| C25B  | H13A  | 54501 | 6,16      | -4,7   | 0,03327 | 0,28  | 4.088 | 3.01  | 173     |       |       |
| H25B  | C23A  | 54501 | 7,78      | -5,74  | 0,03618 | 0,36  | 3.917 | 2.89  | 158     |       |       |
| S14A  | C142  | 56501 | 3,24      | -1,9   | 0,01159 | 0,168 | 4.156 |       |         |       |       |
| H15C  | N5B   | 56501 | 7,28      | -4,99  | 0,02986 | 0,352 | 3.822 | 2.87  | 146     |       |       |
| C2A   | H26B  | 56501 | 9         | -6,67  | 0,03975 | 0,416 | 3.834 | 2.85  | 151     |       |       |
| S14A  | C12B  | 56501 | 9,49      | -7,56  | 0,04638 | 0,42  | 3.510 |       |         |       |       |
| C12A  | C26B  | 56501 | 10,5<br>1 | -7,42  | 0,03963 | 0,499 | 3.358 |       |         |       |       |
| O13A  | H13F  | 56501 | 14,5<br>8 | -11,27 | 0,05718 | 0,657 | 3.572 | 2.52  | 163     |       |       |
| H15A  | H15E  | 55501 | 3,7       | -2,42  | 0,01779 | 0,183 | 2.71  |       |         | -81.8 | -61.2 |
| H14A  | S14B  | 55501 | 5,99      | -4,04  | 0,02568 | 0,291 | 4.005 | 3.16  | 135     |       |       |
| C25A  | H13D  | 55501 | 6,59      | -4,26  | 0,02447 | 0,327 | 3.881 | 3.04  | 134     |       |       |

|      |      |       |           |        |         |       |       |      |     |       |       |
|------|------|-------|-----------|--------|---------|-------|-------|------|-----|-------|-------|
| C13A | S14B | 55501 | 6,65      | -4,79  | 0,03143 | 0,312 | 3.735 |      |     |       |       |
| C16A | O15B | 55501 | 7,93      | -5,21  | 0,02847 | 0,391 | 3.358 |      |     |       |       |
| C26A | H22B | 55501 | 8,54      | -6,53  | 0,04071 | 0,387 | 3.873 | 2.85 | 156 |       |       |
| O24A | H23B | 55501 | 10,2<br>2 | -7,35  | 0,04049 | 0,48  | 3.781 | 2.74 | 161 |       |       |
| H15F | N5A  | 55501 | 10,5<br>9 | -7,7   | 0,0422  | 0,495 | 3.647 | 2.70 | 145 |       |       |
| H26A | C13B | 55501 | 14,7<br>7 | -10,8  | 0,05209 | 0,688 | 3.414 | 2.62 | 129 |       |       |
| O3B  | H13B | 64501 | 10,6<br>2 | -7,18  | 0,03631 | 0,516 | 3.549 | 2.67 | 137 | -12.4 | -26.3 |
| H4B  | S14A | 64501 | 13,4<br>5 | -9,7   | 0,04802 | 0,631 | 3.756 | 2.86 | 140 |       |       |
| H4B  | O13A | 64501 | 24,8      | -18,08 | 0,07072 | 1,158 | 3.232 | 2.37 | 134 |       |       |
| H24H | H24F | 64602 | 10,4<br>4 | -7,78  | 0,04391 | 0,481 | 2.18  |      |     | -5.2  | -6.5  |
| H25A | C242 | 65602 | 1,57      | -0,88  | 0,00626 | 0,083 | 4.424 | 3.66 | 129 | -9.5  | -8.4  |
| O24A | C242 | 65602 | 2,21      | -1,27  | 0,00843 | 0,116 | 4.018 |      |     |       |       |
| H24E | O24B | 65602 | 2,62      | -1,58  | 0,01141 | 0,134 | 4.267 | 3.27 | 153 | -10.9 | -11.1 |
| H24E | C23B | 65602 | 3,04      | -1,8   | 0,01162 | 0,157 | 4.207 | 3.37 | 135 |       |       |
| H13E | H24D | 65602 | 11,7<br>1 | -7,82  | 0,03741 | 0,573 | 2.26  |      |     |       |       |
| H24I | H13B | 65602 | 13,3<br>4 | -8,67  | 0,03779 | 0,662 | 2.24  |      |     |       |       |
| H14E | H14E | 66702 | 1,87      | -1,03  | 0,00598 | 0,1   | 3.00  |      |     | -3.1  | -2.1  |
| H14B | C141 | 67702 | 1,19      | -0,65  | 0,00429 | 0,064 | 3.764 | 3.53 | 96  | -4.1  | -2.6  |
| H24G | C25B | 74602 | 9,8       | -7,75  | 0,04678 | 0,435 | 3.861 | 2.79 | 158 | -15.1 | -16.7 |
| H24A | C23A | 75602 | 5,06      | -3,51  | 0,02468 | 0,243 | 4.176 | 3.11 | 168 | -14.1 | -13.9 |
| H24D | C2B  | 75602 | 2,1       | -1,25  | 0,00944 | 0,108 | 4.449 | 3.55 | 141 | -24.6 | -29.3 |
| H24B | C26B | 75602 | 5,22      | -3,67  | 0,02588 | 0,248 | 4.156 | 3.15 | 154 |       |       |
| H23A | C24B | 75602 | 9,63      | -7,37  | 0,04379 | 0,437 | 3.685 | 2.77 | 142 |       |       |
| H24J | H22A | 75602 | 12,2<br>8 | -8,95  | 0,04643 | 0,573 | 2.12  |      |     |       |       |
| H15A | H14F | 76702 | 7,06      | -4,53  | 0,02498 | 0,352 | 2.44  |      |     | -19.3 | -27.7 |
| H14C | H15D | 76702 | 9,39      | -6,91  | 0,0402  | 0,436 | 2.21  |      |     |       |       |
| H15A | O15B | 76702 | 9,66      | -6,12  | 0,02908 | 0,485 | 3.531 | 2.80 | 125 |       |       |
| H15D | O15A | 76702 | 10,1<br>2 | -6,73  | 0,03393 | 0,496 | 3.569 | 2.72 | 135 |       |       |
| H15E | S14B | 76702 | 8         | -6,08  | 0,03876 | 0,364 | 4.913 | 3.06 | 147 | -13.3 | -20.0 |
| H15E | O15B | 76702 | 16,7<br>3 | -12,37 | 0,05742 | 0,774 | 3.412 | 2.48 | 143 |       |       |
| H15B | S14A | 77702 | 9,53      | -7,28  | 0,04337 | 0,433 | 3.914 | 2.98 | 144 | -13.5 | -11.1 |

|      |      |       |      |     |         |       |       |      |     |  |  |
|------|------|-------|------|-----|---------|-------|-------|------|-----|--|--|
| H15B | O15A | 77702 | 16,7 | -12 | 0,05429 | 0,785 | 3.371 | 2.50 | 137 |  |  |
|------|------|-------|------|-----|---------|-------|-------|------|-----|--|--|

**Table 7: 7**

| Atom1 | Atom2 | sym2  | Gcp   | Vcp    | DEN     | LAP   | X...Y | H...Y | D-H...Y | Pix    | HF    |
|-------|-------|-------|-------|--------|---------|-------|-------|-------|---------|--------|-------|
| S23   | H15A  | 44501 | 2,67  | -1,63  | 0,01198 | 0,136 | 4.433 | 3.56  | 139     | -8.3   | -13.1 |
| S23   | C151  | 45501 | 10,63 | -7     | 0,03409 | 0,524 | 3.618 |       |         | -13.5  | -20.8 |
| H24A  | N5    | 45501 | 6,96  | -4,76  | 0,02893 | 0,336 | 3.846 | 2.88  | 148     |        |       |
| O24   | H15C  | 45501 | 6,49  | -4,44  | 0,02768 | 0,314 | 3.943 | 2.87  | 167     |        |       |
| C13   | C15   | 54501 | 7,73  | -5,48  | 0,03329 | 0,366 | 3.490 |       |         | -105.0 | -67.8 |
| C4    | N5    | 54501 | 2,08  | -1,22  | 0,0089  | 0,108 | 4.083 |       |         |        |       |
| C16   | H15B  | 54501 | 11,62 | -9,11  | 0,05108 | 0,519 | 3.673 | 2.69  | 150     |        |       |
| H12   | H23B  | 54501 | 7,18  | -5,23  | 0,0336  | 0,335 | 2.29  |       |         |        |       |
| Br13  | C231  | 54501 | 8,05  | -5,3   | 0,02884 | 0,397 | 3.636 |       |         |        |       |
| Br13  | O14   | 54501 | 9,33  | -6,44  | 0,03524 | 0,449 | 3.505 |       |         |        |       |
| H14C  | O14   | 54501 | 14,14 | -11,04 | 0,05703 | 0,633 | 3.593 | 2.52  | 171     |        |       |
| H14C  | O15   | 54501 | 9,03  | -5,54  | 0,02533 | 0,459 | 3.463 | 2.87  | 115     |        |       |
| C22   | H23B  | 54501 | 8,91  | -6,4   | 0,03717 | 0,419 | 3.900 | 2.89  | 155     |        |       |
| C24   | S23   | 54501 | 7,59  | -5,42  | 0,03341 | 0,358 | 3.674 |       |         |        |       |
| C25   | C23   | 54501 | 6,72  | -4,71  | 0,02986 | 0,321 | 3.600 |       |         |        |       |
| H24B  | O24   | 54501 | 7,52  | -5,33  | 0,03276 | 0,356 | 3.815 | 2.80  | 155     |        |       |
| Br13  | Br13  | 54502 | 12,28 | -9,6   | 0,0526  | 0,549 | 3.564 |       |         | -14.2  | -14.4 |
| Br13  | H23A  | 54502 | 8,14  | -5,2   | 0,02691 | 0,407 | 3.838 | 3.19  | 118     |        |       |
| O14   | H23A  | 54502 | 4,73  | -3,05  | 0,01997 | 0,235 | 4.057 | 3.00  | 165     |        |       |
| H14A  | S23   | 54502 | 3,24  | -1,99  | 0,01374 | 0,165 | 4.232 | 3.51  | 125     |        |       |
| O3    | H24C  | 54602 | 9,61  | -6,83  | 0,03804 | 0,455 | 3.667 | 2.67  | 152     | -22.5  | -20.3 |
| H26   | C25   | 54602 | 8,09  | -5,55  | 0,03193 | 0,39  | 3.745 | 2.86  | 138     |        |       |
| H25   | C26   | 54602 | 8,04  | -5,6   | 0,03278 | 0,385 | 3.750 | 2.84  | 141     |        |       |
| C241  | O3    | 54602 | 10,93 | -7,09  | 0,03334 | 0,542 | 3.323 |       |         |        |       |
| H26   | H24C  | 54602 | 4,22  | -2,92  | 0,02203 | 0,202 | 2.57  |       |         |        |       |
| H15A  | H14A  | 65502 | 8,67  | -6,53  | 0,04007 | 0,396 | 2.27  |       |         | -6.2   | -7.9  |
| C4    | H4    | 65602 | 10,8  | -7,47  | 0,03865 | 0,519 | 3.601 | 2.87  | 110     | -8.0   | -12.8 |

**Table 8: 9**

| Atom1 | Atom2 | sym2  | Gcp     | Vcp      | DEN     | LAP   | X...Y | H...Y | D-H...Y | Pix   | HF    |
|-------|-------|-------|---------|----------|---------|-------|-------|-------|---------|-------|-------|
| C2    | C15   | 45503 | 0,00144 | -0,00092 | 0,01679 | 0,189 | 3.894 |       |         | -92.4 | -67.3 |
| C12   | H26   | 45503 | 0,00385 | -0,00279 | 0,04078 | 0,473 | 3.728 | 2.85  | 138     |       |       |
| O3    | S14   | 45503 | 0,00224 | -0,00143 | 0,022   | 0,294 | 3.667 |       |         |       |       |
| H12   | C16   | 45503 | 0,00325 | -0,00216 | 0,03051 | 0,419 | 3.645 | 2.87  | 128     |       |       |
| H12   | H15C  | 45503 | 0,00115 | -0,00076 | 0,01623 | 0,149 | 2.75  |       |         |       |       |
| Br13  | C1    | 45503 | 0,00294 | -0,00205 | 0,03203 | 0,37  | 3.712 |       |         |       |       |
| H14A  | C24   | 45503 | 0,00414 | -0,00321 | 0,04813 | 0,489 | 3.760 | 2.78  | 149     |       |       |
| C151  | H24C  | 45503 | 0,00236 | -0,00154 | 0,02422 | 0,306 | 4.083 | 3.06  | 158     |       |       |
| H22   | S14   | 45503 | 0,00272 | -0,00187 | 0,02954 | 0,345 | 4.000 | 3.13  | 137     |       |       |
| C22   | O15   | 45503 | 0,00517 | -0,00366 | 0,04649 | 0,644 | 3.103 |       |         |       |       |
| C23   | C151  | 45503 | 0,00417 | -0,00288 | 0,03876 | 0,527 | 3.381 |       |         |       |       |
| H4    | Br13  | 56501 | 0,00113 | -0,00066 | 0,01093 | 0,154 | 4.352 | 3.66  | 123     | -8.7  | -11.7 |
| H4    | S14   | 56501 | 0,00289 | -0,00185 | 0,026   | 0,378 | 3.997 | 3.09  | 141     | -10.6 | -13.4 |
| H14B  | C24   | 65402 | 0,00497 | -0,00389 | 0,05456 | 0,584 | 3.683 | 2.62  | 166     |       |       |
| C141  | H24A  | 65402 | 0,00528 | -0,00371 | 0,04628 | 0,661 | 3.564 | 2.76  | 130     |       |       |
| H14C  | Br13  | 65402 | 0,00015 | -0,00008 | 0,00183 | 0,021 | 5.341 | 4.50  | 136     |       |       |
| H15B  | Br13  | 65402 | 0,00026 | -0,00014 | 0,00327 | 0,037 | 5.107 | 4.26  | 137     |       |       |
| N5    | H23   | 66402 | 0,01969 | -0,02646 | 0,24045 | 1,245 | 2.791 | 1.89  | 150     | -39.6 | -46.5 |
| H4    | O24   | 66402 | 0,00493 | -0,0033  | 0,03985 | 0,633 | 3.266 | 2.72  | 111     |       |       |
| H16   | O23   | 66402 | 0,00834 | -0,00595 | 0,06301 | 1,033 | 3.198 | 2.39  | 130     |       |       |
| H15A  | O23   | 66402 | 0,00541 | -0,00408 | 0,05395 | 0,65  | 3.560 | 2.53  | 157     |       |       |
| H14B  | C151  | 74404 | 0,00438 | -0,00278 | 0,03245 | 0,577 | 3.449 | 2.92  | 110     | -6.1  | -7.5  |
| Br13  | H24B  | 74504 | 0,00478 | -0,00327 | 0,0414  | 0,605 | 3.612 | 2.98  | 117     | -18.8 | -27.0 |
| H25   | O23   | 74504 | 0,00328 | -0,00231 | 0,03487 | 0,41  | 3.770 | 2.71  | 164     |       |       |
| H24B  | O3    | 74504 | 0,00367 | -0,00228 | 0,02746 | 0,488 | 3.474 | 2.78  | 122     |       |       |
| H24A  | C22   | 74504 | 0,00525 | -0,00385 | 0,05026 | 0,641 | 3.422 | 2.64  | 128     |       |       |
